# Supplementary material
Source: Springer Nature journal article supplement (https://www.springermedizin.de/resource/supplementary/12992_2013_306_MOESM5_ESM.pdf/9616196)

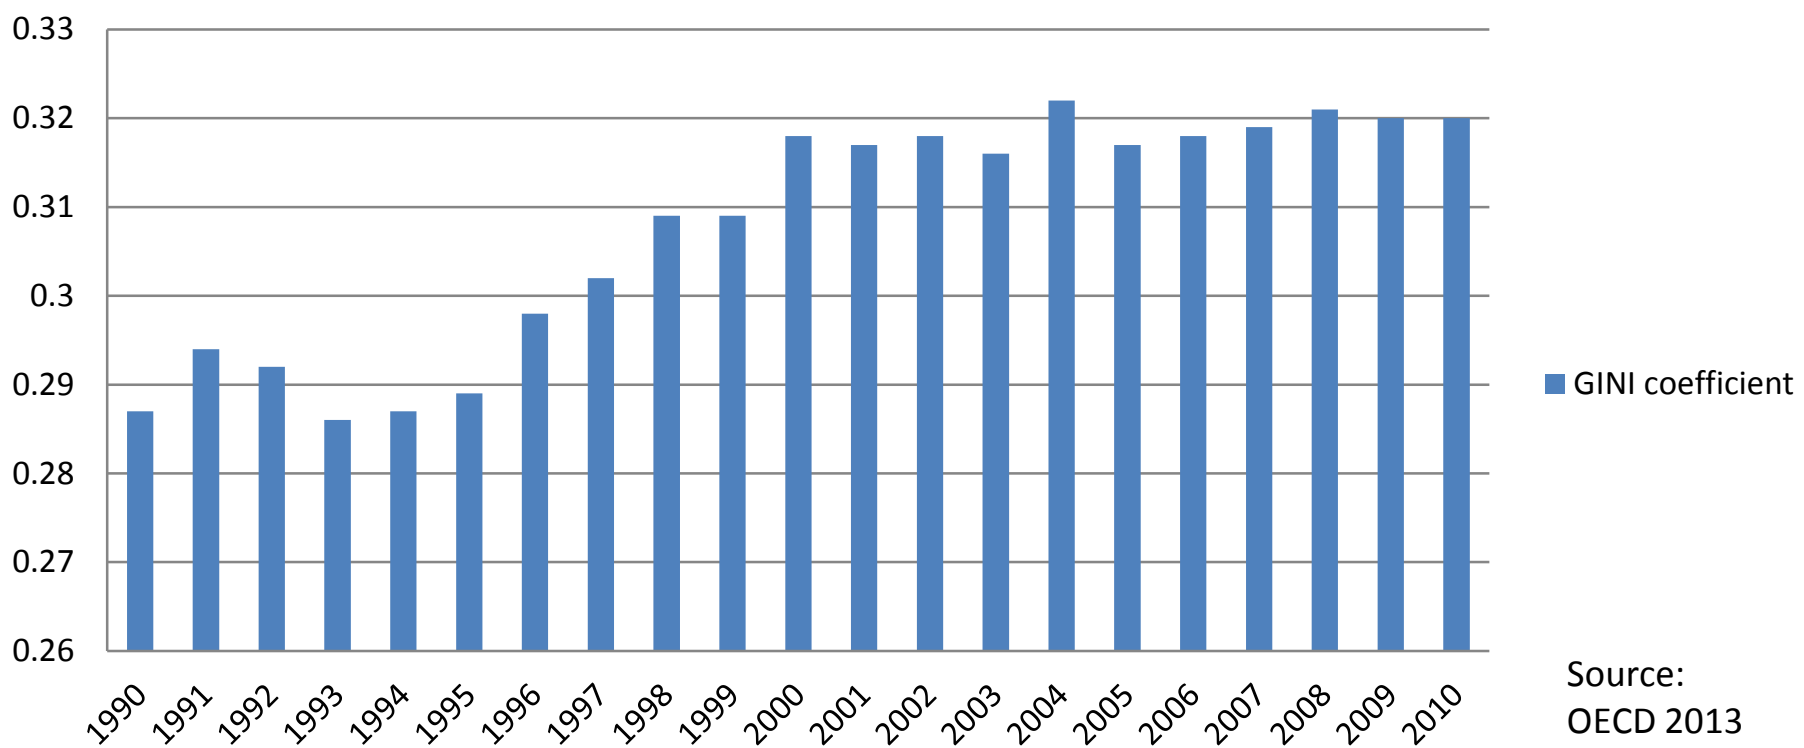

Supplement: MOESM5 [file 9616196]
